# Supplementary material
Source: PubMed Central journal article supplement (PMC2699484)
Supplement: NIHMS115081-supplement-Supplementary_Data.pdf [file NIHMS115081-supplement-Supplementary_Data.pdf]

# **SUPPLEMENTARY MATERIAL**

## **Regulation of B cell fate commitment and immunoglobulin V<sub>H</sub> gene rearrangements by Ikaros**

Damien Reynaud, Ignacio Demarco, Karen Reddy, Hilde Schjerven,  
Eric Bertolino, Zhengshan Chen, Stephen T. Smale, Susan Winandy  
& Harinder Singh.

a

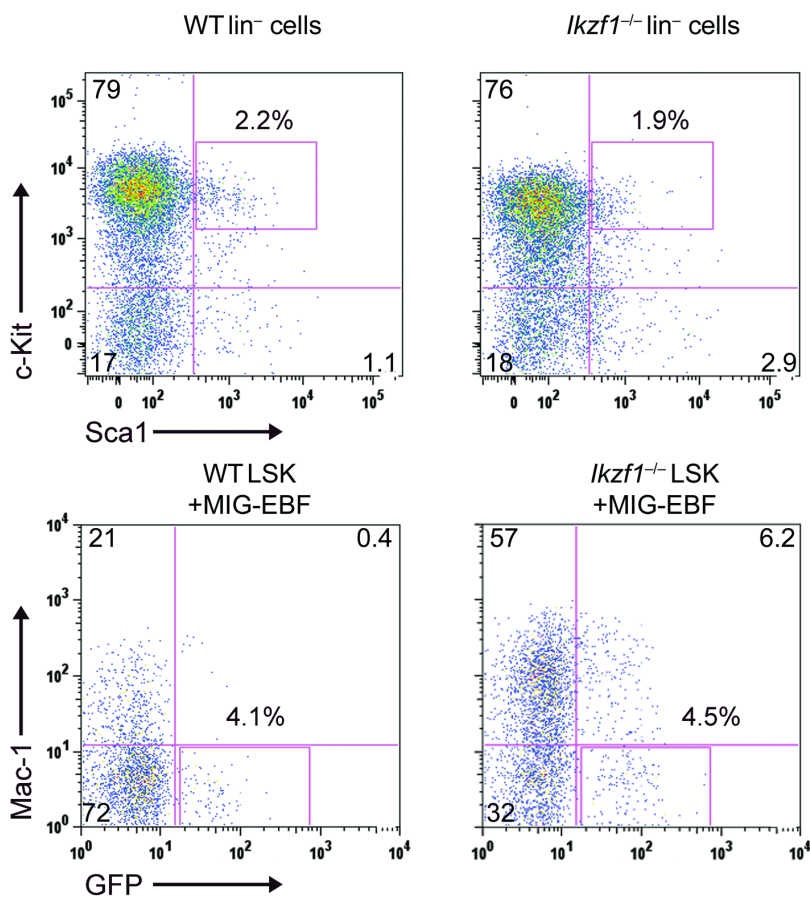

b

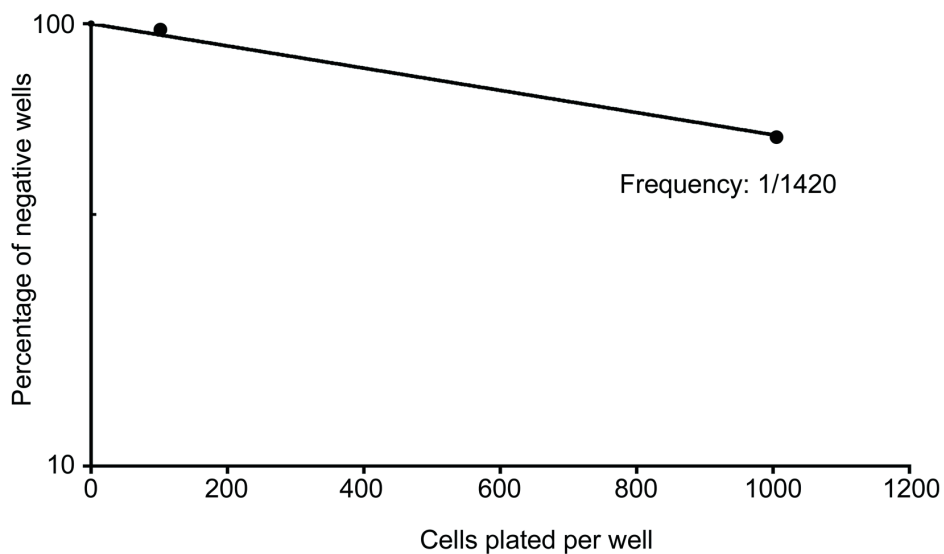

| Cells plated per well                 | 100            | 1000           |
|---------------------------------------|----------------|----------------|
| Percentage of CD19 <sup>+</sup> wells | 4.2%<br>(4/96) | 44%<br>(11/25) |

**Figure S1. Quantitative analysis of the generation of EBF-rescued *Ikzf1*<sup>-/-</sup> CD19<sup>+</sup> cells.**

**(a)** LSK cells were sorted from WT or *Ikzf1*<sup>-/-</sup> bone marrow mice (top) and directly transduced by spin-infection with MIG-EBF retrovirus. After 72 h of culture, GFP<sup>+</sup> Mac1<sup>-</sup> transduced *Ikzf1*<sup>-/-</sup> cells were sorted directly at the indicated cell numbers onto OP9 stroma cells and cultured in lymphoid conditions (bottom). Cells were harvested after 2 to 4 weeks and analyzed for B lineage (CD19<sup>+</sup>) precursors. **(b)** The number of EBF-transduced *Ikzf1*<sup>-/-</sup> LSK cells plated per well is plotted against the percentage of negative wells for growth of CD19<sup>+</sup> progeny. Solid line represents the best-fit regression used to determine the frequency of generation of CD19<sup>+</sup> progeny. Data are representative of 2 independent experiments.

**Supplementary Figure 2**  
Reynaud et al

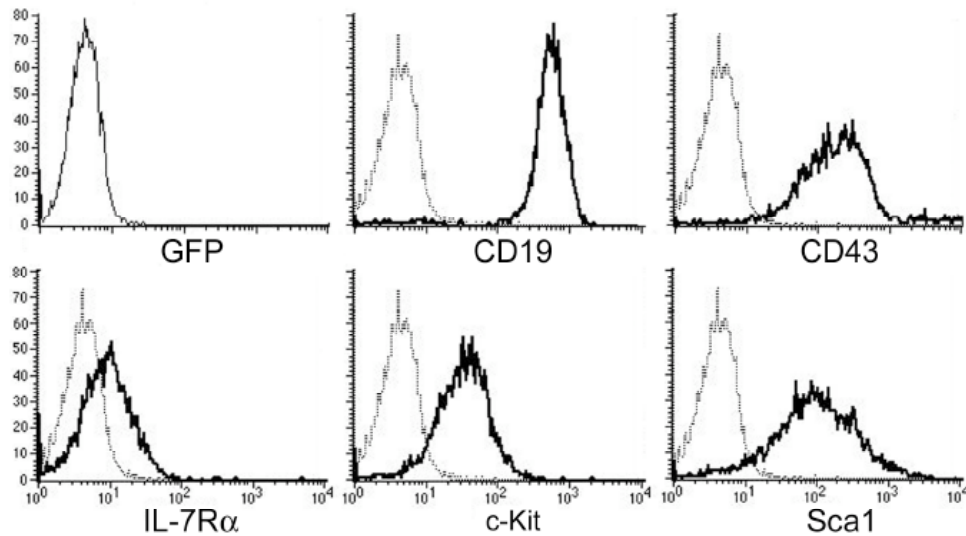

**Figure S2. Cell surface phenotype of an EBF-rescued *Ikzf1*<sup>-/-</sup> clone (type B).**

Flow cytometry of an *Ikzf1*<sup>-/-</sup> CD19<sup>+</sup> clone (type B) that does not sustain the expression of GFP and the retrovirally encoded *Ebf1* gene. Data are representative of three independently derived clones.

Supplementary Figure 3  
Reynaud et al

D<sub>H</sub> segments

J<sub>H</sub>3 segments

```

Dsp2.3----AAGGGATCTACTACTGTG-----TCTACTATGGTTACGAC-----GCCTGGTTTGCTTACTGGGGCCAAGGGACTCTGG
Dsp2.4----AAGGGATCTACTACTGTG-----TCTACTATGGTTACGAC-----GCCTGGTTTGCTTACTGGGGCCAAGGGACTCTGG
Dsp2.5----AAGGTATCTACTACTGTG-----TCTACTATGGTAACTAC-----GCCTGGTTTGCTTACTGGGGCCAAGGGACTCTGG
Dsp2.6----AAGGGATCTACTACTGTG-----CCTACTATGGTTACGAC-----GCCTGGTTTGCTTACTGGGGCCAAGGGACTCTGG
Dsp2.7----AAGGGATCTACTACTGTG-----CCTACTATGGTAACTAC-----GCCTGGTTTGCTTACTGGGGCCAAGGGACTCTGG
Dsp2.8----AAGGGATCTACTACTGTG-----CCTACTATGGTAACTAC-----GCCTGGTTTGCTTACTGGGGCCAAGGGACTCTGG
Dsp2.2----AAGGGATCTACTACTGTG-----TCTACTATGATTACGAC-----GCCTGGTTTGCTTACTGGGGCCAAGGGACTCTGG
FL16.1----AAGGGATCTACTACTGTG-----TTTATTACTACGGTAGTAGCTAC-----GCCTGGTTTGCTTACTGGGGCCAAGGGACTCTGG
FL16.2----AAGGGATCTACTACTGTG-----TTTATTACTACGGCTAC-----GCCTGGTTTGCTTACTGGGGCCAAGGGACTCTGG
Dq52-----AAGCGGAGCACCACAGTG-----CAACTGGGAC-----GCCTGGTTTGCTTACTGGGGCCAAGGGACTCTGG
  
```

Spleen cells

```

-----AAGGGATCTACTACTGTG-----TCTATGATGGTTAC-----A-----CTTACTGGGGCCAAGGGACTCTGG
-----AAGGGATCTACTACTGTG-----TTTATTACTACGGCAGTAGC-----CG-----GCCTGGTTTGCTTACTGGGGCCAAGGGACTCTGG
-----AAGGGATCTACTACTGTG-----CCTACTATAGTAA-----AAAG-----GCCTGGTTTGCTTACTGGGGCCAAGGGACTCTGG
-----AAGGGATCTACTACTGTG-----CCTACTATAGTAACTA-----GGTGTG-----GCCTGGTTTGCTTACTGGGGCCAAGGGACTCTGG
-----AAGGGATCTACTACTGTG-----TTTATTACTACGGTA-----AAGGGACTCTGG
-----AAGGGATCTACTACTGTG-----TCTACTATGATTACG-----GCCTGGTTTGCTTACTGGGGCCAAGGGACTCTGG
-----AAGGGATCTACTACTGTG-----TTTATTACTACGGTAGTA-----CCC-----TTTGCTTACTGGGGCCAAGGGACTCTGG
-----AAGGGATCTACTACTGTG-----CCTACTATAGTAACTAC-----GA-----TGGTTTGCTTACTGGGGCCAAGGGACTCTGG
-----AAGGGATCTACTACTGTG-----TTTATTACTACGGTAGTAGC-----CT-----CTTACTGGGGCCAAGGGACTCTGG
-----AAGGGATCTACTACTGTG-----CCTACTATAGTAACTAC-----GATGG-----TGGTTTGCTTACTGGGGCCAAGGGACTCTGG
-----AAGGGATCTACTACTGTG-----TTTATTACTACGGCAGTAG-----CCG-----GCCTGGTTTGCTTACTGGGGCCAAGGGACTCTGG
  
```

WT CD19<sup>+</sup> cells

```

-----AAGGGATCTACTACTGTG-----TTTATTACTACGGTAGTAGCTAC-----CACCTGAC-----TACTGGGGCCAAGGGACTCTGG
-----AAGGGATCTACTACTGTG-----TTTATTACTACGGTAGTAGCTAC-----GCCTGGTTTGCTTACTGGGGCCAAGGGACTCTGG
-----AAGGGATCTACTACTGTG-----TTTATTACTACGGTAGTAG-----GCCTGGTTTGCTTACTGGGGCCAAGGGACTCTGG
-----AAGGGATCTACTACTGTG-----TCTACTATGGTT-----CCCCCTTGAC-----TACTGGGGCCAAGGGACTCTGG
  
```

*Ikzf1*<sup>-/-</sup>  
CD19<sup>+</sup> cells

```

-----AAGGGATCTACTACTGTG-----CCTACTATAGTAA-----CTGGTTTGCTTACTGGGGCCAAGGGACTCTGG
-----AAGGGATCTACTACTGTG-----TTTATTACTACGGTAGTA-----GCCTGGTTTGCTTACTGGGGCCAAGGGACTCTGG
-----AAGGGATCTACTACTGTG-----CCTACTATAGTAACTAC-----GCCTGGTTTGCTTACTGGGGCCAAGGGACTCTGG
-----AAGGGATCTACTACTGTG-----TTTATTACTACGGTAGTA-----GCCTGGTTTGCTTACTGGGGCCAAGGGACTCTGG
-----AAGGGATCTACTACTGTG-----TTTATTACTACGGTAGTAGCTAC-----CTGGTTTGCTTACTGGGGCCAAGGGACTCTGG
-----AAGGGATCTACTACTGTG-----TCTACTATGGTAACTAC-----CTGGTTTGCTTACTGGGGCCAAGGGACTCTGG
-----AAGGGATCTACTACTGTG-----TCTACTATGGTAACTAC-----GTTTGCTTACTGGGGCCAAGGGACTCTGG
-----AAGGGATCTACTACTGTG-----TTTATTACTACGGTAGTAGCTAC-----GTTTGCTTACTGGGGCCAAGGGACTCTGG
-----AAGGGATCTACTACTGTG-----CCTACTATAGTAACTAC-----CTGGTTTGCTTACTGGGGCCAAGGGACTCTGG
-----AAGGGATCTACTACTGTG-----TTTATTACTACGGTA-----GTTTGCTTACTGGGGCCAAGGGACTCTGG
-----AAGGGATCTACTACTGTG-----TCTACTATGGTAACTACT-----GCCTGGTTTGCTTACTGGGGCCAAGGGACTCTGG
-----AAGGGATCTACTACTGTG-----TCTACTATGGTAACTAC-----GTTTGCTTACTGGGGCCAAGGGACTCTGG
-----AAGGGATCTACTACTGTG-----TTTATTACTACGGTAGTAGC-----TGCTTACTGGGGCCAAGGGACTCTGG
-----AAGGGATCTACTACTGTG-----TCTACTATGGTAACTAC-----GTTTGCTTACTGGGGCCAAGGGACTCTGG
-----AAGGGATCTACTACTGTG-----TTTATTACTACGGTAGTAG-----TTGCTTACTGGGGCCAAGGGACTCTGG
-----AAGGGATCTACTACTGTG-----TCTACTATGGTAACTAC-----CTGGTTTGCTTACTGGGGCCAAGGGACTCTGG
-----AAGGGATCTACTACTGTG-----TCTACTATGATTACGAC-----GGTTTGCTTACTGGGGCCAAGGGACTCTGG
-----AAGGGATCTACTACTGTG-----TTTATTACTACGGTAGTAGCTAC-----CTGGTTTGCTTACTGGGGCCAAGGGACTCTGG
-----AAGGGATCTACTACTGTG-----TTTATTACTACGGTAGTA-----GCCTGGTTTGCTTACTGGGGCCAAGGGACTCTGG
-----AAGGGATCTACTACTGTG-----TCTACTATGGTAA-----CTGGTTTGCTTACTGGGGCCAAGGGACTCTGG
-----AAGGGATCTACTACTGTG-----TTTATTACTACGGTAGTAG-----TTTGCTTACTGGGGCCAAGGGACTCTGG
  
```

**Figure S3. D-J<sub>H</sub> rearrangements in *Ikzf1*<sup>-/-</sup> pro-B cells are oligoclonal but lack N-region diversity.**

DNA sequence analysis of recombined D-J<sub>H</sub> regions in *Ikzf1*<sup>-/-</sup> pro-B cells generated by limiting dilution (see **Supplementary Fig. 1**). D<sub>H</sub>J<sub>H</sub> rearrangements were amplified from genomic DNA by PCR. DNA from spleen cells or wild-type pro-B cells were used as controls. Top, germline sequences of 10 D<sub>H</sub> segments (GenBank GI:126349412 and GI:23306144).

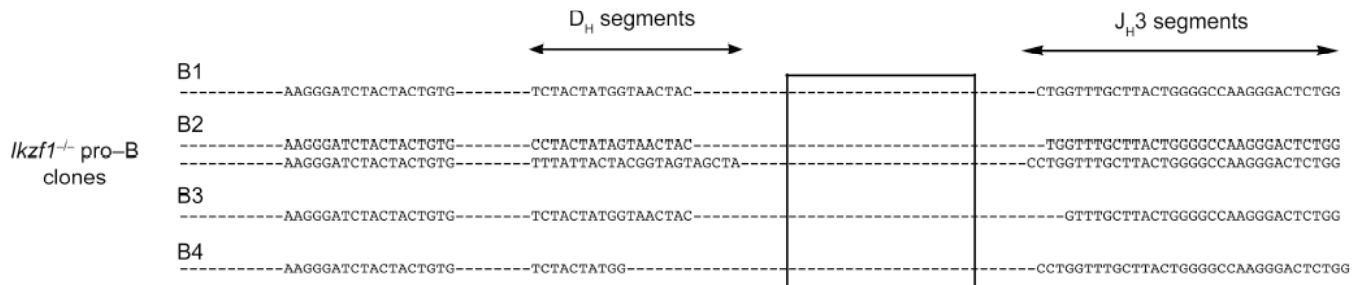

**Figure S4. D-J<sub>H</sub> rearrangements in *Ikzf1*<sup>-/-</sup> pro-B clones**

DNA sequence analysis of recombined D-J<sub>H</sub> regions in *Ikzf1*<sup>-/-</sup> pro-B clones. Recombined DNA fragments were amplified from genomic DNA by PCR. Note that *Ikzf1*<sup>-/-</sup> pro-B clones B1, B3, B4 have single D-J<sub>H</sub> rearrangements while *Ikzf1*<sup>-/-</sup> pro-B clone B2 has both alleles rearranged.

**Supplementary Figure 5**  
Reynaud et al

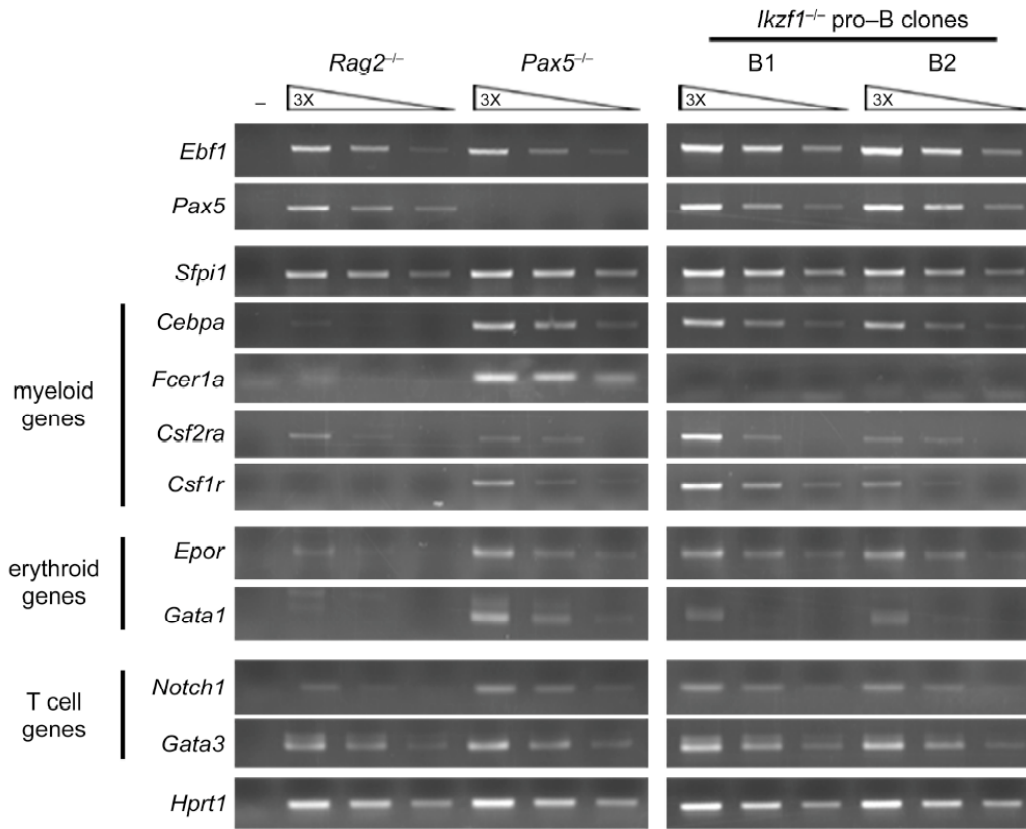

**Figure S5. *Ikzf1<sup>-/-</sup>* pro-B cells mis-express alternate lineage genes.**

Analysis of alternate lineage genes in *Ikzf1<sup>-/-</sup>* pro-B clones. Serial dilutions of cDNA were analyzed by RT-PCR after normalization to *Hprt1*. cDNAs from *Rag2<sup>-/-</sup>* and *Pax5<sup>-/-</sup>* pro-B cell lines were used as controls. Data are representative of two independent experiments using 4 independent clones.



**Supplementary Figure 6**  
Reynaud et al

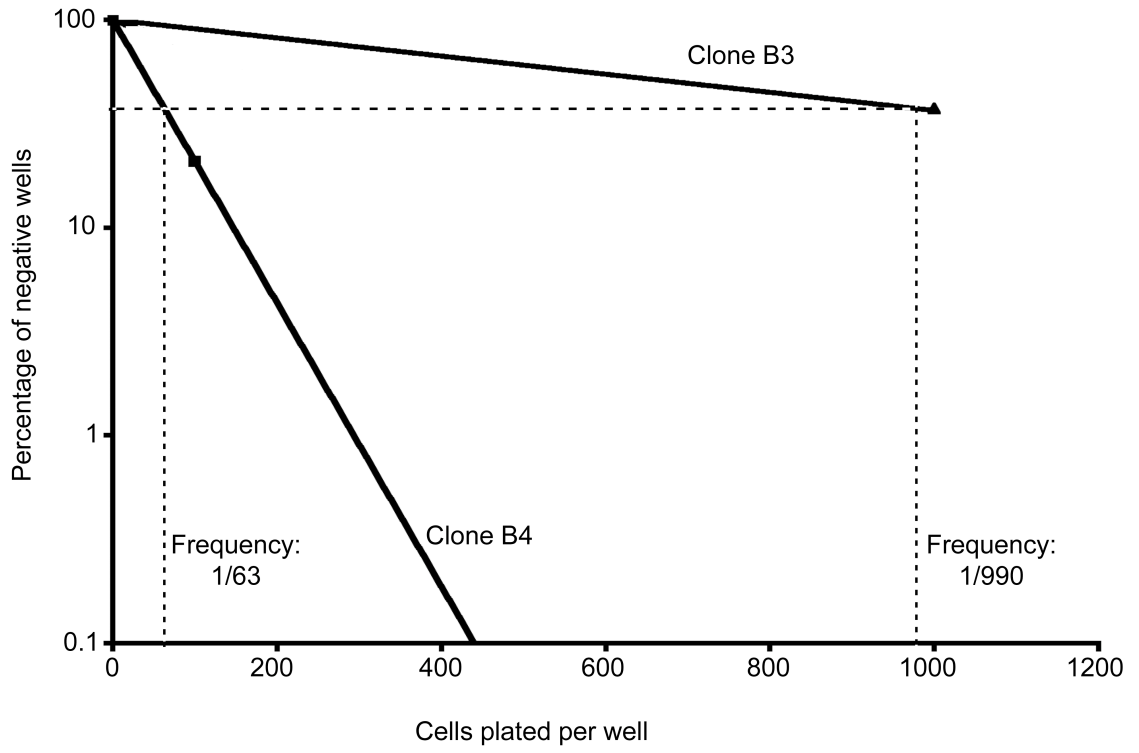

**Figure S6. Quantitative assessment of the myeloid potential of *Ikzf1*<sup>-/-</sup> pro-B clones.**

*Ikzf1*<sup>-/-</sup> pro-B clones were sorted directly at the indicated cell numbers onto S17 stromal cells in individual wells. Cells were cultured in lymphoid conditions for 3 days and then switched to myeloid conditions. Cells were harvested after 5 to 6 days and analyzed for myeloid (Mac1<sup>+</sup>) precursors. The number of *Ikzf1*<sup>-/-</sup> pro-B cells plated per well is plotted against the percentage of negative wells for growth of Mac1<sup>+</sup> progeny. Solid line represents the best-fit regression and the dashed line intercepts the y-axis at 37%, which indicates the frequency of trans-differentiation. Under these conditions, all the wells plated with 100 *Pax5*<sup>-/-</sup> pro-B cells scored positive for the generation of Mac-1<sup>+</sup> progeny (data not shown). Three independent clones were analyzed in this experiment. Data from two clones is shown.

a

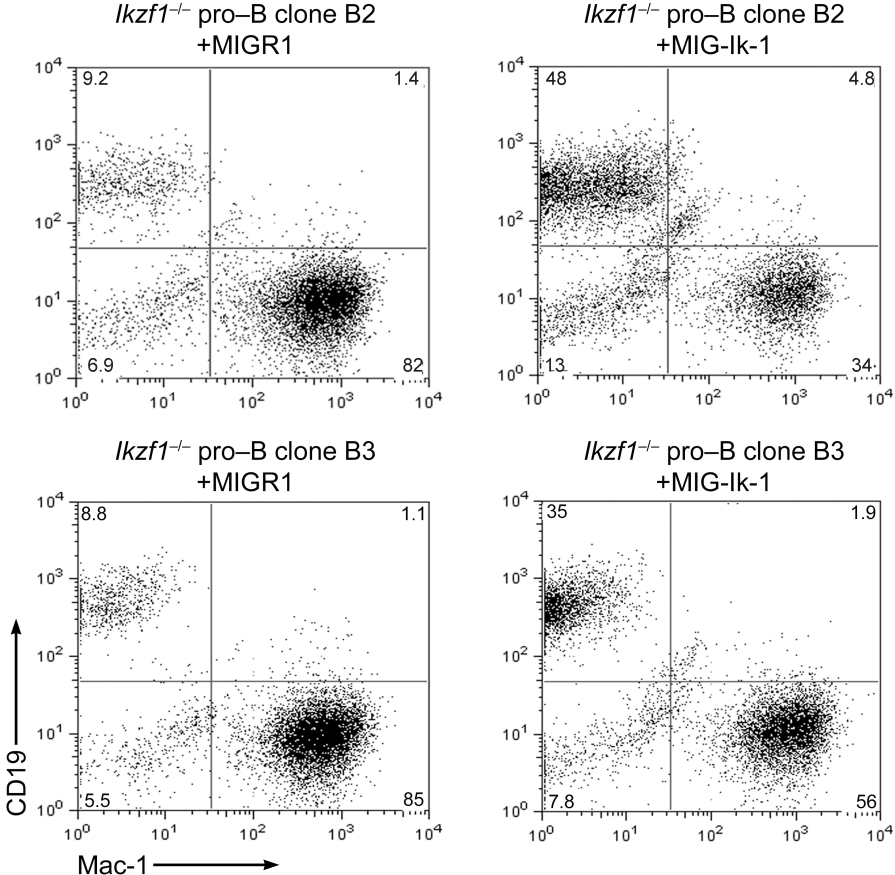

b

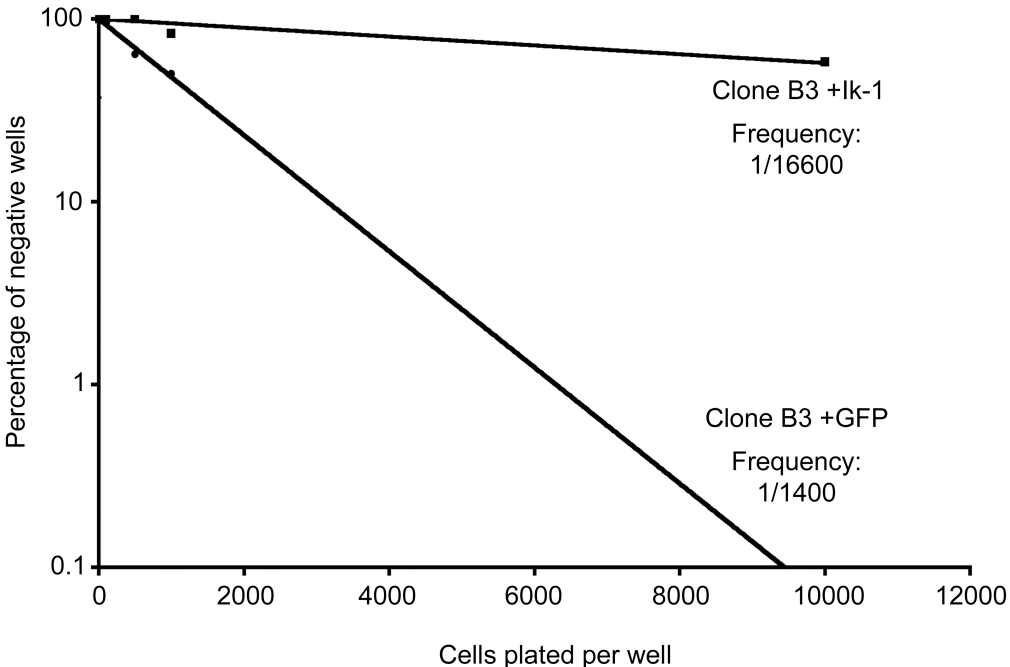

**Figure S7. Restoration of Ik-1 expression in *Ikzf1*<sup>-/-</sup> pro-B cells severely restrained their myeloid potential.**

**(a)** *Ikzf1*<sup>-/-</sup> pro-B cells transduced with MIGR1 or MIG-Ik-1 were cultured as described in **Fig. 2a** and analyzed at day 6 by flow cytometry for the expression of Mac-1 and CD19. **(b)** Transduced *Ikzf1*<sup>-/-</sup> pro-B cells were sorted directly at the indicated cell numbers onto S17 stromal cells in individual wells and were cultured for 8 days as described in **(a)**. The number of transduced *Ikzf1*<sup>-/-</sup> pro-B cells plated per well is plotted against the percentage of negative wells for growth of Mac1<sup>+</sup> progeny. Solid line represents the best-fit regression used to determine the frequency of generation of Mac1<sup>+</sup> progeny. Data are representative of two independent experiments.

**Supplementary Figure 8**  
Reynaud et al

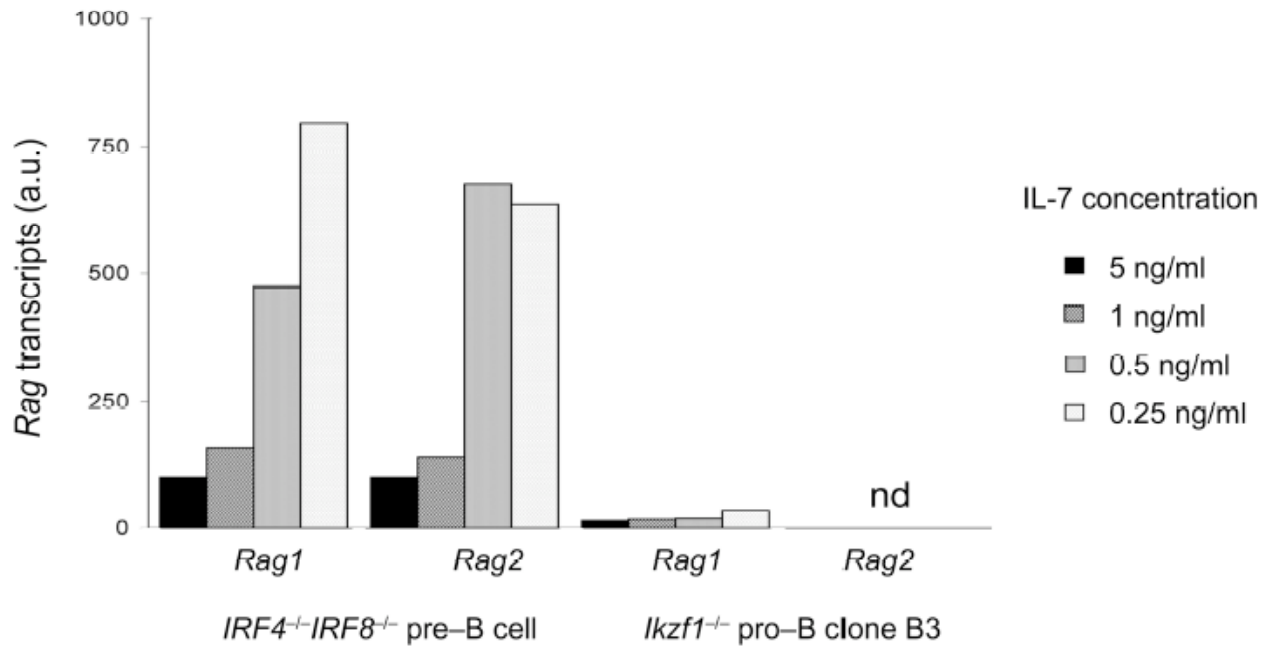

**Figure S8. Attenuation of IL-7 signaling does not activate expression of *Rag* gene expression in *Ikzf1*<sup>-/-</sup> pro-B cells.**

Q-PCR analysis of *Rag1* and *Rag2* mRNA expression in *Ikzf1*<sup>-/-</sup> pro-B or *Irf4*<sup>-/-</sup>*Irf8*<sup>-/-</sup> pre-B cells cultured in the indicated concentrations of IL-7 (3 days). *Hprt1* transcripts were used for normalization. Data are representative of two independent experiments. n.d. stands for not detectable.

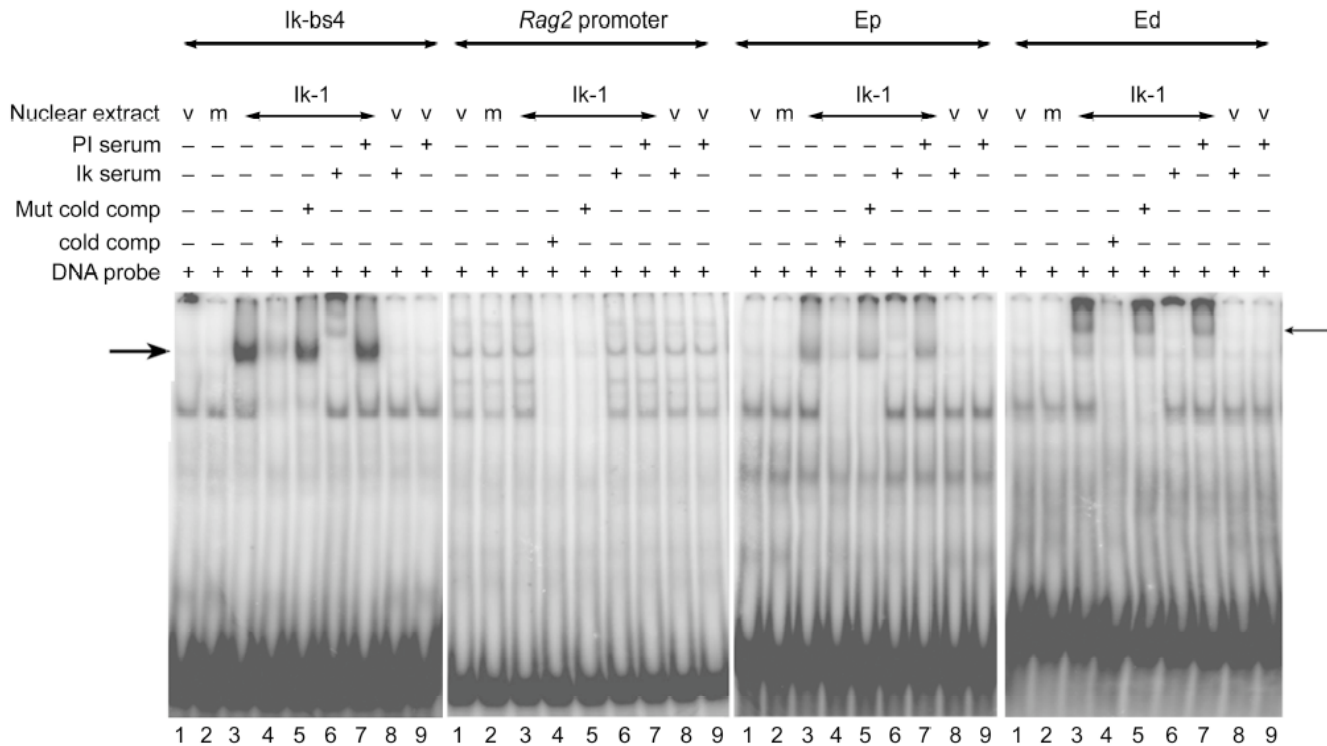

**Figure S9. Analysis of Ikaros binding sites in the *Rag* locus by EMSA.**

EMSAs were performed using nuclear extracts from 293T cells as described in **Fig. 5c**. Control extracts were generated from 293T cells transfected with an empty vector (lane 1) or with Ikaros-159A DNA binding mutant (lane 2). The Ik-bs4 probe contains a high affinity Ikaros binding site and was used as positive control. Other probes spanned putative Ikaros binding sites in *Rag2* promoter as well as Ep and Ed enhancers. Where indicated binding reactions included competitor DNA in 50-fold molar excess or either pre-immune (PI) or anti-Ikaros antiserum<sup>60</sup> (Ik serum). Data are representative of two independent experiments.

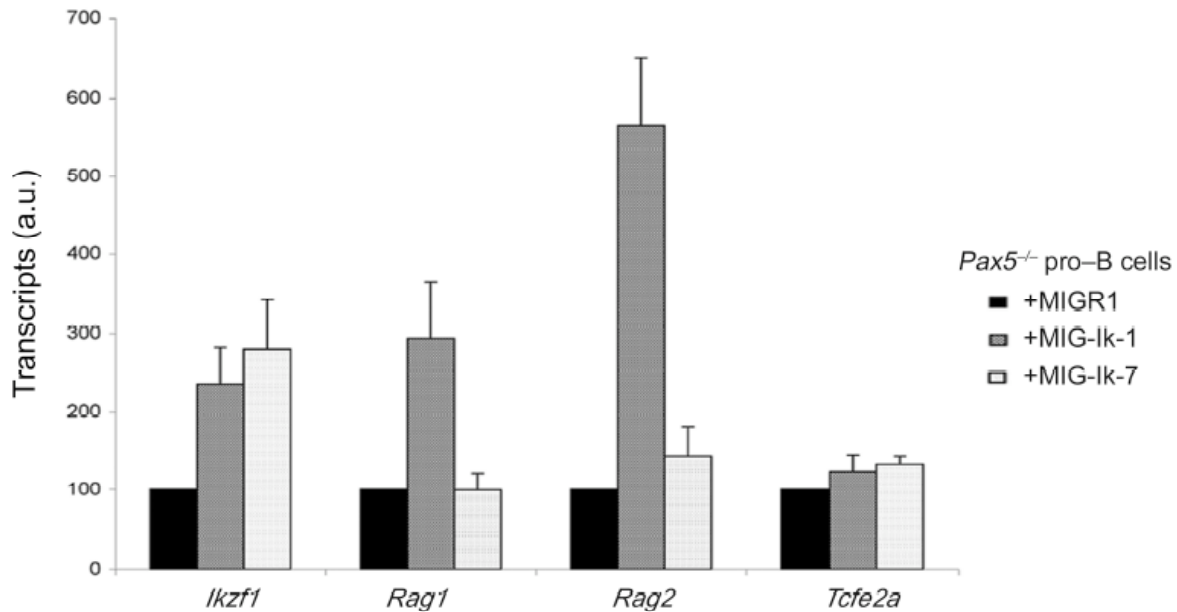

**Figure S10. Increased expression of Ikaros in *Pax5*<sup>-/-</sup> pro-B cells promotes *Rag* gene expression.**

Q-PCR analysis of *Ikzf1* (*Ikaros*), *Rag1*, *Rag2* and *Tcf2a* (*E2A*) transcripts in *Pax5*<sup>-/-</sup> pro-B cells transduced with MIGR1, MIG-Ik-1 or MIG-Ik-7 vectors. *Hprt1* transcripts were used for normalization. The relative expression of each gene is expressed as a fold difference in relation to that detected in MIGR1 transduced cells (set to 100). Data are from two independent experiments each involving three samples per condition. Error bars represent the standard deviation from the mean.

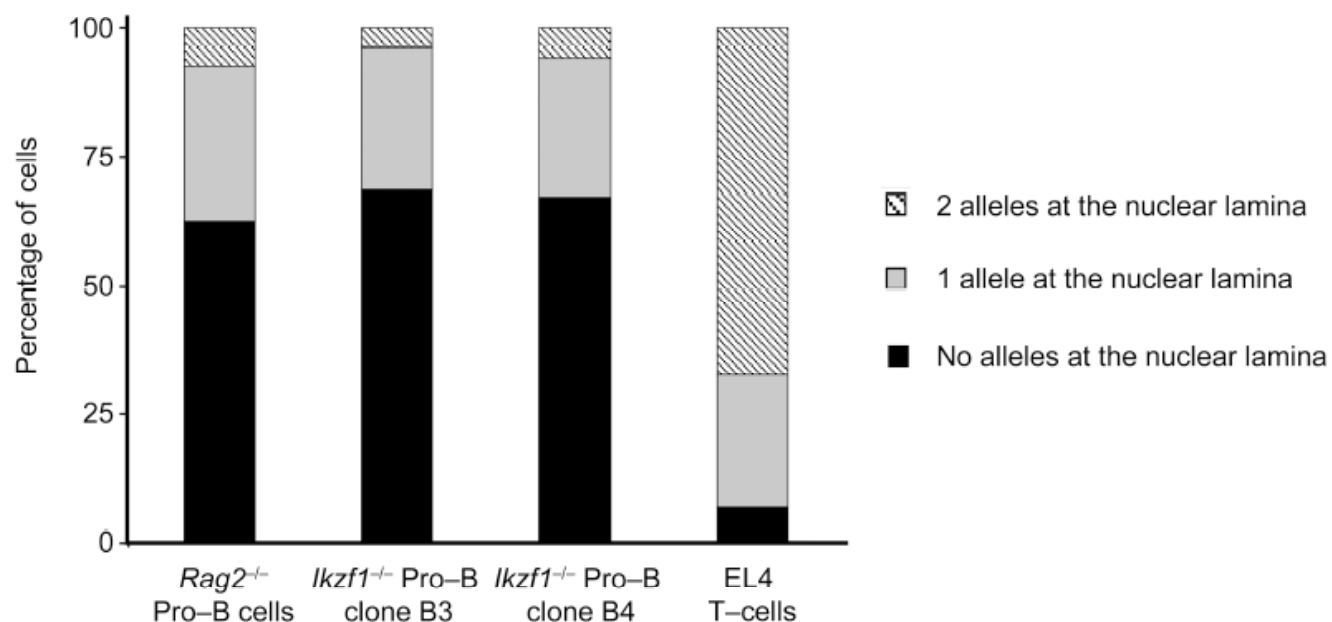

**Figure S11. Ikaros is not required for the nuclear repositioning of the *Igh* locus.**

Three-dimensional immuno-FISH analysis was performed on the *Igh* locus as described in **Fig. 7**. Signals co-localizing with lamin B1 were scored as peripheral. At least 110 nuclei were scored with each cell type. Graph indicates percentage of cells representing two (stripes), one (grey) or none (black) of their *Igh* alleles at the nuclear lamina.



**TABLE 1: Antibodies used in this study**

| Name  | Alternative name         | Clone      | Fluorochrome | Source                                                         |
|-------|--------------------------|------------|--------------|----------------------------------------------------------------|
| CD19  |                          | 1d3<br>1d3 | PE<br>APC    | Becton Dickinson / Pharmingen<br>Becton Dickinson / Pharmingen |
| CD11b | Mac-1, Integrin $\alpha$ | M1/70      | PE           | Becton Dickinson / Pharmingen                                  |
| CD43  | Ly-48, Leukosialin       | s7         | PE           | Becton Dickinson / Pharmingen                                  |
| CD127 | IL-7R $\alpha$           | SB/199     | PE           | Becton Dickinson / Pharmingen                                  |
| CD117 | c-Kit                    | 2B8<br>2B8 | PE<br>APC    | Becton Dickinson / Pharmingen<br>Becton Dickinson / Pharmingen |
| Sca1  | Ly-6a/e                  | d7<br>d7   | FITC<br>PE   | Becton Dickinson / Pharmingen<br>Becton Dickinson / Pharmingen |
| CD115 | M-CSFR, CSF1R            | AFS98      | PE           | eBioscience                                                    |

**Antibodies used for lineage depletion**

|                |                          |          |        |                               |
|----------------|--------------------------|----------|--------|-------------------------------|
| CD19           |                          | 1d3      | Biotin | Becton Dickinson / Pharmingen |
| CD45R          | B220                     | RA3-6B2  | Biotin | Becton Dickinson / Pharmingen |
| IgM            |                          | II/43    | Biotin | Becton Dickinson / Pharmingen |
| CD3 $\epsilon$ |                          | 145-2C11 | Biotin | Becton Dickinson / Pharmingen |
| CD8a           | Ly-2                     | 53-6.7   | Biotin | Becton Dickinson / Pharmingen |
| CD11b          | Mac-1, Integrin $\alpha$ | M1/70    | Biotin | Becton Dickinson / Pharmingen |
| Gr1            | Ly-6C                    | RB6-8C5  | Biotin | Becton Dickinson / Pharmingen |
| Ter119         | Ly-76                    | TER119   | Biotin | Becton Dickinson / Pharmingen |

**TABLE 2: Primers used for RT-PCR analysis**

| Gene                   |         | Sequence<br>5'→3'          | Gene                         |         | Sequence<br>5'→3'                  |
|------------------------|---------|----------------------------|------------------------------|---------|------------------------------------|
| <i>Hprt1</i>           | Forward | GTAATGATCAGTCAACGGGGGAC    | <i>Ebf1</i>                  | Forward | CAAGACAAGAACCCCTGAAATG             |
|                        | Reverse | CCAGCAAGCTTGCAACCTTAACCA   |                              | Reverse | GTAACCTCTGGAAGCCGTAGT              |
| <i>Ikzf1 (Ikaros)</i>  | Forward | CACTACCTCTGGAGCACAGC       | <i>Sfp1</i>                  | Forward | CGGATGTGCTTCCCTTATCAAAC            |
|                        | Reverse | ATAGGGCATGTCTGACAGGCA      |                              | Reverse | TGACTTTCTTACCTCGCCTGTC             |
| <i>Ikzf3 (Aiolos)</i>  | Forward | TGCGGGTTATCCTGCATTAGC      | <i>Cebpa</i>                 | Forward | GGTGGACAAGAACAGCAACGAGTA           |
|                        | Reverse | TTGGCATCGAAGCAGTGCCG       |                              | Reverse | TAGAGATCCAGCGACCCGAAACCA           |
| <i>endogenous Ebf1</i> | Forward | ACCTTCCTCAATGGCTCAG        | <i>Fcer1a</i>                | Forward | GCATCCAGGATATAGCAGAC               |
|                        | Reverse | TCGTAGCAGAATCCAACCTC       |                              | Reverse | GTGATCTTGTCTTGCTCCT                |
| <i>exogenous Ebf1</i>  | Forward | ACCTTCCTCAATGGCTCAG        | <i>Csf2ra</i>                | Forward | GAGGTCACAAGGTCAAGGTG               |
|                        | Reverse | ATTCCTAGCCCATCTGCTG        |                              | Reverse | GATTGACAGTGGCAGGCTTC               |
| <i>Pax5</i>            | Forward | CGGGTCAGCCATGGTTGTG        | <i>Epor</i>                  | Forward | CGGACACATCGAGTTTTGTG               |
|                        | Reverse | GTGCTGTCTCTCAAACACG        |                              | Reverse | TCATAGGTGCTCCAGGAGGT               |
| <i>Igll1</i>           | Forward | CTTGAGGGTCAATGAAGCTCAGAAGA | <i>Gata1</i>                 | Forward | ACTTTCCAGTCCTTTCTTC                |
|                        | Reverse | CTTGGGCTGACCTAGGATTG       |                              | Reverse | CAGGTAGTGACCTGTCCTGT               |
| <i>VpreB1</i>          | Forward | CGTCTGTCCTGCTCATGCTGC      | <i>Notch1</i>                | Forward | GGTATGCAAGGAGTCTGAAG               |
|                        | Reverse | ACGGCACAGTAATACACAGCC      |                              | Reverse | CACACTCATTGATGTCAACC               |
| <i>Rag1</i>            | Forward | TGCAGACATTCTAGCACTCTGGCC   | <i>Gata3</i>                 | Forward | CTGTCAGACCACCACCAC                 |
|                        | Reverse | ACATCTGCCTTCACGTCGATCCGG   |                              | Reverse | CGATTTGCTAGACATCTTCC               |
| <i>Rag2</i>            | Forward | CACATCCACAAGCAGGAAGTACAC   | <b>Germ-line transcripts</b> |         |                                    |
|                        | Reverse | TCCCTCGACTATACACCACGTCAA   | <i>V<sub>H</sub>J558</i>     | Forward | TAACCATGGRATGGAGCTG                |
| <i>Dntt (TdT)</i>      | Forward | GAAGATGGGAACAACCTGAAGAG    |                              | Reverse | TTTCTGACACWCTCAGGATGTG             |
|                        | Reverse | CAGGTGCTGGAACATTCTGGGAG    | <i>V<sub>H</sub>7183</i>     | Forward | CGGTACCAAGAASAMCCTGTWCCTGCAAATGASC |
| <i>Csf1r</i>           | Forward | GCGATGTGTGAGCAATGGCAGT     |                              | Reverse | GTCTCTCCGCGCCCCCTGCTGGTCC          |
|                        | Reverse | AGACCGTTTTGCGTAAGACCTG     | <i>V<sub>H</sub>Q52</i>      | Forward | AGCTATGGTGTACAC                    |
|                        |         |                            |                              | Reverse | TATGAAAGCTGCATT                    |
|                        |         |                            | <i>I<sub>μ</sub></i>         | Forward | ACCTGGGAATGTATGTTGTGGCTT           |
|                        |         |                            |                              | Reverse | ATGCAGATCTCTGTTTTGCTCCTC           |
|                        |         |                            | <i>μ0</i>                    | Forward | AACATCTGAGTTTCTGAGGCTTGG           |
|                        |         |                            |                              | Reverse | TCATCTGAACCTTCAAGGATGCTC           |

**TABLE 3: Primers used for Q-PCR**

| Gene                  |         | Sequence<br>5'→3'    |
|-----------------------|---------|----------------------|
| <i>Hprt1</i>          | Forward | CAACAACAACTTGTCTGGA  |
|                       | Reverse | ACCTCTCGAAGTGTTGGATA |
| <i>Ikzf1 (Ikaros)</i> | Forward | GAAGACCTGTGCAAGATAGG |
|                       | Reverse | TCCTTCTCATAGTTGGCACT |
| <i>Rag1</i>           | Forward | CTGCAGACATTCTAGCACTC |
|                       | Reverse | AACTGAAGCTCAGGGTAGAC |
| <i>Rag2</i>           | Forward | CCTTCAGTGCCAAAATAAGA |
|                       | Reverse | TCATAAGTGAGAAGCCTGGT |
| <i>Tcfe2a (E2A)</i>   | Forward | CCAGTCTTTTGCATAACCAT |
|                       | Reverse | AGGTCCTTCTTGCCTCTTC  |
| <i>Csf1r</i>          | Forward | TACTGCTGTTGCTGCTCTT  |
|                       | Reverse | GCTATTGCCTTCGTATCTCT |

**TABLE 4: Primers used for analyzing *Igh* DNA rearrangements**

| Gene                            |                                    | Sequence<br>5'→3'                  |
|---------------------------------|------------------------------------|------------------------------------|
| <i>Igh</i> locus                | Forward                            |                                    |
|                                 | VHJ558-5'                          | CGAGCTCTCCARCACAGCCTWCATGCARCTCARC |
|                                 | VHQ52-5'                           | CGGTACCAGACTGARCATCASCAAGGAC       |
|                                 | VH7183-5'                          | CGGTACCAAGAASAMCCTGTWCCTGCAAATGASC |
|                                 | DHL-5'                             | GGAATTCGMTTTTGTSAAGGGATCTACTACTGTG |
| Reverse                         |                                    |                                    |
| JH3-3'                          | GTCTAGATTCTCACAAGAGTCCGATAGACCCTGG |                                    |
| <i>Acta1</i> ( $\alpha$ -actin) | Forward                            | GGCATCGTGTGGATTCTG                 |
|                                 | Reverse                            | CACGAAGGAATAGCCACGC                |

**TABLE 5: Primers used for ChIP analysis**

| <b>Gene</b>                              |         | <b>Sequence<br/>5'→3'</b> |
|------------------------------------------|---------|---------------------------|
| $\gamma$ -satellite                      | Forward | TATGGCGAGGAAAAGTAAA       |
|                                          | Reverse | TTCACGTCCTAAAGTGTGTAT     |
| <i>Rag1</i> promoter                     | Forward | AGCCAGGTGCAGCTGGAGCTGGG   |
|                                          | Reverse | CAACATATGCTGTCTACTCTCTC   |
| <i>Rag2</i> promoter                     | Forward | GAAGGAGGTCACAGTCAGTT      |
|                                          | Reverse | CAGGGTAGAGTGTGTTGTGTG     |
| Proximal Enhancer<br><i>Rag</i> locus    | Forward | CCTAACTGTAGATCGCATCC      |
|                                          | Reverse | AGGTGAATTGAGAACTGGAG      |
| Distal Enhancer<br><i>Rag</i> locus      | Forward | GTCACTTGGAAACCACGTGGTTA   |
|                                          | Reverse | TAGTGACATGCTGCTGCTTATA    |
| Erag<br><i>Rag</i> locus                 | Forward | TATTCAGGAGGGAATTAATGAC    |
|                                          | Reverse | GACAGAACCCGAGGGCTTAGCAT   |
| <i>Acta1</i> ( $\alpha$ - <i>actin</i> ) | Forward | AGAGTCAGAGCAGCAGGTAG      |
|                                          | Reverse | CAAGGCTCAATAGCTTTCTT      |
| <i>Actb</i> ( $\beta$ - <i>actin</i> )   | Forward | CGCCATGGATGACGATATCG      |
|                                          | Reverse | CGAAGCCGGCTTTGCACATG      |

**TABLE 6: Oligonucleotide probes used for EMSA**

| Probe                        |         | Sequence                                                                          |
|------------------------------|---------|-----------------------------------------------------------------------------------|
| Control                      |         |                                                                                   |
| Ik-bs4 (wild type)           | Forward | TGACA <b>GGGA</b> ATACACAT <b>TCCC</b> AAAAGC                                     |
|                              | Reverse | GCTTTTGGGAATGTGTATTCCCTGTCA                                                       |
| mutant                       | Forward | TGACA <b>ttt</b> AATACACATT <b>aaa</b> AAAAGC                                     |
|                              | Reverse | GCTTTT <b>ttt</b> AATGTGTATT <b>aaa</b> TGTCA                                     |
| <i>Rag1</i> promoter         |         |                                                                                   |
| wild type                    | Forward | TCTGTGGTGT <b>GGG</b> AGAGT <b>GGGA</b> GGGCAGTGAG                                |
|                              | Reverse | CTCACTGCCCTTCCCCTCTCCCACACCACAGA                                                  |
| mutant                       | Forward | TCTGTGGTGT <b>ttt</b> AGAGT <b>ttt</b> AAGGGCAGTGAG                               |
|                              | Reverse | CTCACTGCCCTT <b>aaa</b> ACTCT <b>aaa</b> ACACCACAGA                               |
| <i>Rag2</i> promoter         |         |                                                                                   |
| wild type                    | Forward | GGTCACAGTCAGTTAC <b>TCCC</b> GTTACACCAGCACA                                       |
|                              | Reverse | TGTGCTGGTGTAAACGGGAGTAAC <b>TACT</b> GTGACC                                       |
| mutant                       | Forward | GGTCACAGTCAGTTACT <b>aaa</b> GTTACACCAGCACA                                       |
|                              | Reverse | TGTGCTGGTGTAACT <b>ttt</b> AGTAAC <b>TACT</b> GTGACC                              |
| <i>Rag</i> proximal enhancer |         |                                                                                   |
| Ep (wild type)               | Forward | TTTCTACAGCT <b>TCCC</b> TAAGCATTAGCT <b>TCCC</b> ACTACCCGAG                       |
|                              | Reverse | CTCGGGTAGTGGGAGCTAATGCTTAGGGAAGCTGTAGAAA                                          |
| mutant                       | Forward | TTTCTACAGCTT <b>aaa</b> TAAGCATTAGCT <b>aaa</b> ACTACCCGAG                        |
|                              | Reverse | CTCGGGTAGT <b>ttt</b> AGCTAATGCTT <b>ttt</b> AAGCTGTAGAAA                         |
| <i>Rag</i> distal enhancer   |         |                                                                                   |
| Ed (wild type)               | Forward | CGAGAGAT <b>GGGA</b> GAAAA <b>TCCC</b> CTCGCCT <b>TCCC</b> AGAAGTCC               |
|                              | Reverse | GGACTTCTGGGAGCGAGGGGATTTTTCTCCCATCTCTCG                                           |
| mutant                       | Forward | CGAGAGAT <b>ttt</b> AGAAAA <b>Taaa</b> CTCGCCT <b>aaa</b> AGAAGTCC                |
|                              | Reverse | GGACTTCT <b>ttt</b> AGGCGAG <b>ttt</b> ATTTTTCT <b>aaa</b> ATCTCTCG               |
| <i>Rag</i> Erag              |         |                                                                                   |
| Erag (wild type)             | Forward | TGCTCGACTGAAA <b>TTCCT</b> TCT <b>CCT</b> GTCTT <b>GGAA</b> AT <b>GGG</b> TAAGAGG |
|                              | Reverse | CCTCTTACCCATTTCCAAGCAGGAGAGGAATTT <b>CAGT</b> CGAGCA                              |
| mutant 1                     | Forward | TGCTCGACTGAAAT <b>aa</b> TCTCTCTGTCTT <b>ttt</b> AAATGGGTAAGAGG                   |
|                              | Reverse | CCTCTTACCCATTT <b>Taa</b> AAGCAGGAGAttAATTT <b>CAGT</b> CGAGCA                    |
| mutant 2                     | Forward | TGCTCGACTGAAAT <b>aa</b> TCT <b>Taa</b> TGCTT <b>ttt</b> AAAT <b>ttt</b> TAAGAGG  |
|                              | Reverse | CCTCTT <b>Aaaa</b> ATTT <b>Taa</b> AAGCAttAGAttAATTT <b>CAGT</b> CGAGCA           |

Ikaros binding motifs are indicated in red

Mutant Ikaros binding motifs are indicated in lower case
